# Supplementary material for: Hydrothermal synthesis, crystal structure and properties of three-dimensional Co(ii)-4f heterometallic–organic frameworks
Source: Royal Society of Chemistry journal article supplement (doi:10.1039/c2ce26082d), 2012-01-01
Supplement: c2ce26082d.pdf [file c2ce26082d.pdf]

# Hydrothermal synthesis, Crystal structure and Properties of Three-Dimensional Co(II)-4f Heterometallic-Organic Frameworks

Shu-Ju Wang, Yan-Wen Tian, Gang Xiong, Li-Xin You, Fu Ding, Mei-yan Guo, En-Jun Gao,  
Philippe F. Smet, Dirk Poelman, Lin-Jiu Xiao, Ya-Guang Sun\*

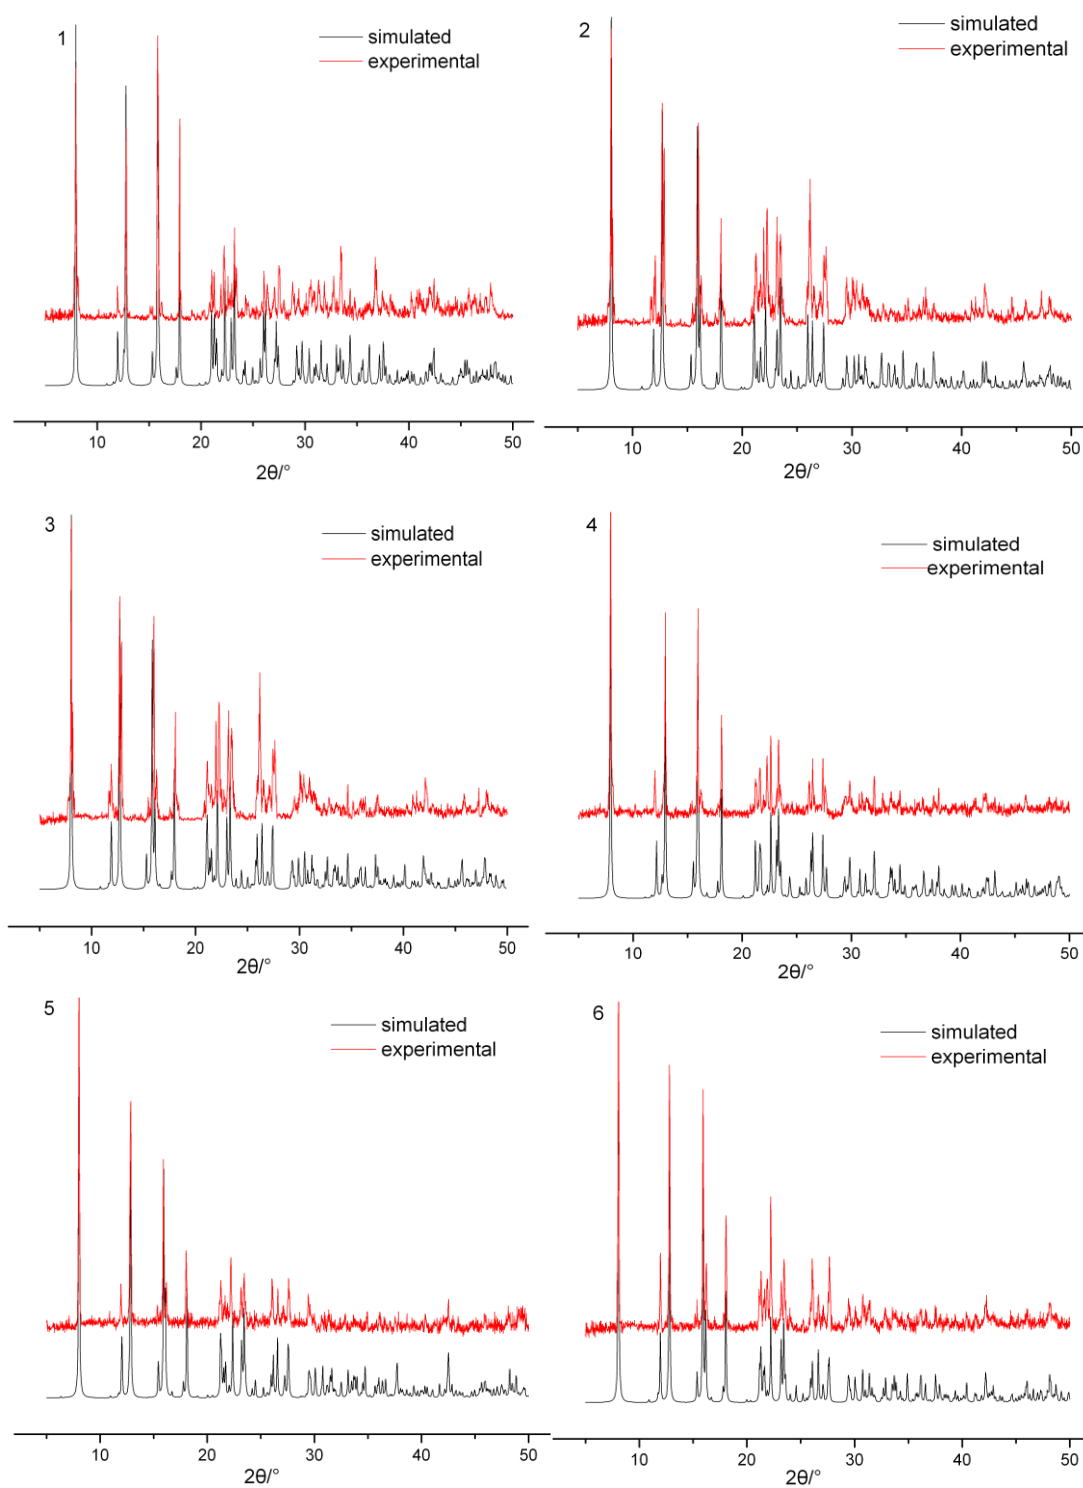

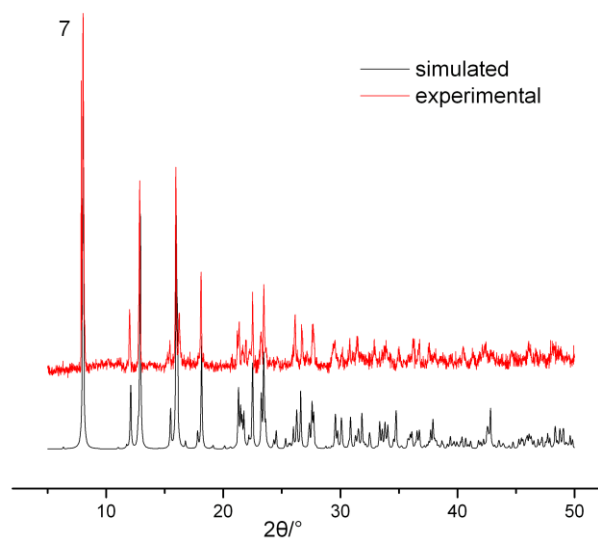

Fig. S1 The simulated and experimental PXRD patterns of **1-7**.

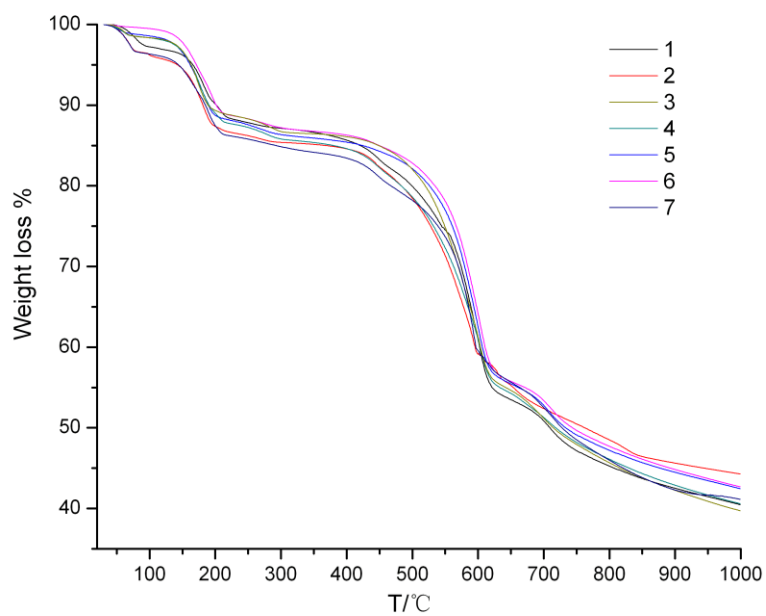

Fig. S2. TGA curves of **1-7**.

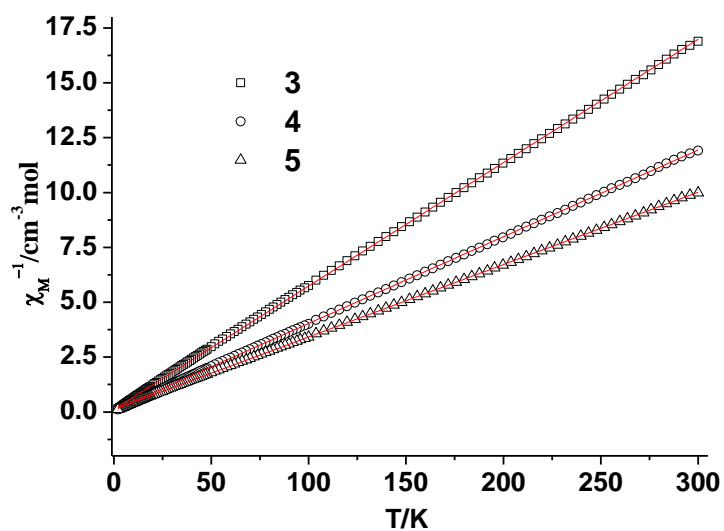

Fig. S3. Temperature vs  $\chi_M^{-1}$  curves for 3-5. The red solid lines stand for the best fitting.

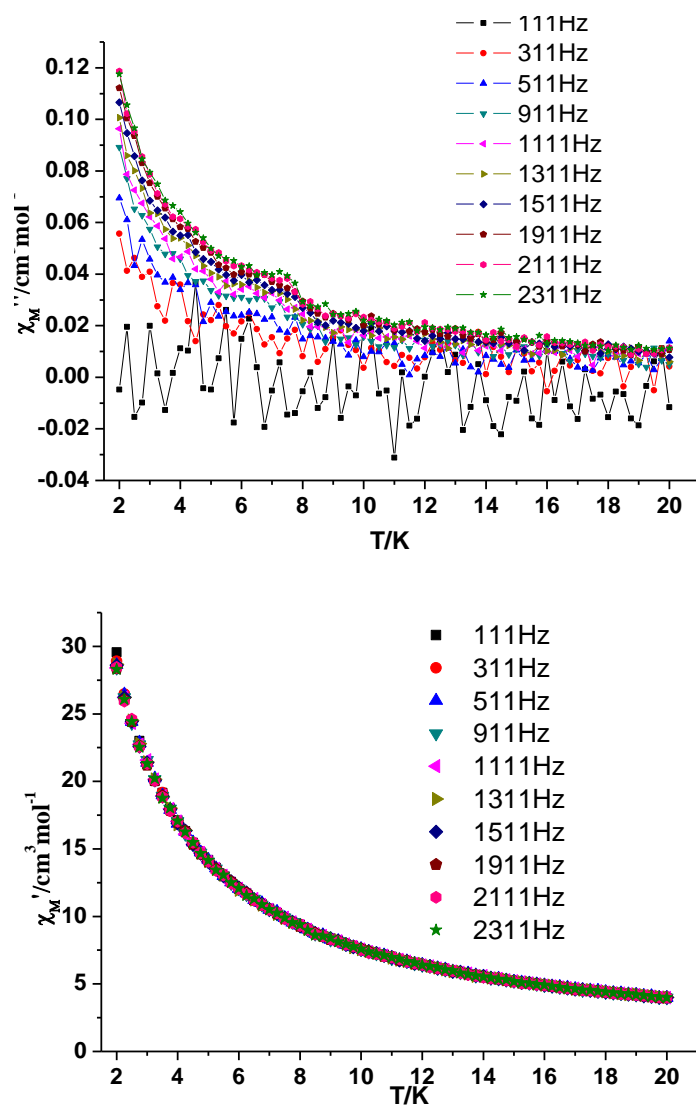

Fig. S4. Temperature dependence of in phase  $\chi_M'$  and out-of-phase  $\chi_M''$  of 4 under zero direct-current (dc) field.

Table S1. Bond lengths [Å] and angles [deg] for **1-7**.

| <b>1</b>              |                 |                      |                 |
|-----------------------|-----------------|----------------------|-----------------|
| Pr(1)-O(1)            | 2.393(2)        | Pr(1)-O(5)           | 2.436(2)        |
| Pr(1)-O(6)#1          | 2.448(4)        | Pr(1)-O(9)           | 2.459(6)        |
| Pr(1)-O(2)#1          | 2.475(4)        | Pr(1)-O(3)#2         | 2.517(3)        |
| Pr(1)-O(10)           | 2.561(3)        | Pr(1)-O(4)#2         | 2.679(2)        |
| Pr(1)-O(1)#1          | 2.840(4)        | Co(1)-O(12)          | 2.094(6)        |
| Co(1)-N(1)            | 2.110(3)        | Co(1)-N(1)#3         | 2.110(3)        |
| Co(1)-O(11)#3         | 2.114(3)        | Co(1)-O(11)          | 2.114(3)        |
| Co(1)-O(13)           | 2.128(6)        | O(4)-Pr(1)#4         | 2.679(2)        |
| O(3)-Pr(1)#4          | 2.517(3)        |                      |                 |
| O(1)-Pr(1)-O(5)       | 81.19(8)        | O(1)-Pr(1)-O(6)#1    | 79.76(8)        |
| O(5)-Pr(1)-O(6)#1     | 131.48(7)       | O(1)-Pr(1)-O(9)      | 80.86(7)        |
| O(5)-Pr(1)-O(9)       | 78.66(8)        | O(6)#1-Pr(1)-O(9)    | 140.14(10)      |
| O(1)-Pr(1)-O(2)#1     | 125.01(7)       | O(5)-Pr(1)-O(2)#1    | 80.44(9)        |
| O(6)#1-Pr(1)-O(2)#1   | 75.03(14)       | O(9)-Pr(1)-O(2)#1    | 143.33(9)       |
| O(1)-Pr(1)-O(3)#2     | 135.98(7)       | O(5)-Pr(1)-O(3)#2    | 142.31(6)       |
| O(6)#1-Pr(1)-O(3)#2   | 73.03(6)        | O(9)-Pr(1)-O(3)#2    | 98.55(7)        |
| O(2)#1-Pr(1)-O(3)#2   | 80.40(6)        | O(1)-Pr(1)-O(10)     | 148.16(8)       |
| O(5)-Pr(1)-O(10)      | 74.28(9)        | O(6)#1-Pr(1)-O(10)   | 131.91(7)       |
| O(9)-Pr(1)-O(10)      | 74.75(9)        | O(2)#1-Pr(1)-O(10)   | 70.74(12)       |
| O(3)#2-Pr(1)-O(10)    | 68.85(8)        | O(1)-Pr(1)-O(4)#2    | 88.54(8)        |
| O(5)-Pr(1)-O(4)#2     | 152.50(9)       | O(6)#1-Pr(1)-O(4)#2  | 70.50(11)       |
| O(9)-Pr(1)-O(4)#2     | 74.53(7)        | O(2)#1-Pr(1)-O(4)#2  | 125.61(7)       |
| O(3)#2-Pr(1)-O(4)#2   | 50.12(6)        | O(10)-Pr(1)-O(4)#2   | 104.00(9)       |
| O(1)-Pr(1)-O(1)#1     | 76.47(9)        | O(5)-Pr(1)-O(1)#1    | 65.06(11)       |
| O(6)#1-Pr(1)-O(1)#1   | 67.24(12)       | O(9)-Pr(1)-O(1)#1    | 139.47(9)       |
| O(2)#1-Pr(1)-O(1)#1   | 48.81(9)        | O(3)#2-Pr(1)-O(1)#1  | 121.06(10)      |
| O(10)-Pr(1)-O(1)#1    | 109.89(8)       | O(4)#2-Pr(1)-O(1)#1  | 136.95(6)       |
| O(12)-Co(1)-N(1)      | 89.71(7)        | O(12)-Co(1)-N(1)#3   | 89.71(7)        |
| N(1)-Co(1)-N(1)#3     | 179.43(14)      | O(12)-Co(1)-O(11)#3  | 86.83(6)        |
| N(1)-Co(1)-O(11)#3    | 86.98(8)        | N(1)#3-Co(1)-O(11)#3 | 92.98(8)        |
| O(12)-Co(1)-O(11)     | 86.83(6)        | N(1)-Co(1)-O(11)     | 92.98(8)        |
| N(1)#3-Co(1)-O(11)    | 86.98(8)        | O(11)#3-Co(1)-O(11)  | 173.66(13)      |
| O(12)-Co(1)-O(13)     | 180.000(2)      | N(1)-Co(1)-O(13)     | 90.29(7)        |
| N(1)#3-Co(1)-O(13)    | 90.29(7)        | O(11)#3-Co(1)-O(13)  | 93.17(6)        |
| O(11)-Co(1)-O(13)     | 93.17(6)        |                      |                 |
| #1 -x+1/2,-y+5/2,-z+1 | #2 x,-y+2,z+1/2 | #3 -x+1,y,-z+3/2     | #4 x,-y+2,z-1/2 |
| <b>2</b>              |                 |                      |                 |
| Eu(1)-O(6')#1         | 2.331(12)       | Eu(1)-O(3)           | 2.337(3)        |
| Eu(1)-O(5')           | 2.355(10)       | Eu(1)-O(10)          | 2.399(6)        |
| Eu(1)-O(4)#1          | 2.421(3)        | Eu(1)-O(5)           | 2.438(11)       |
| Eu(1)-O(6)#1          | 2.454(12)       | Eu(1)-O(9)           | 2.462(3)        |

|                      |            |                      |            |
|----------------------|------------|----------------------|------------|
| Eu(1)-O(2)#2         | 2.469(3)   | Eu(1)-O(10')         | 2.474(6)   |
| Eu(1)-O(1)#2         | 2.544(3)   | Eu(1)-O(3)#1         | 2.768(3)   |
| O(1)-Eu(1)#4         | 2.544(3)   | O(2)-Eu(1)#4         | 2.469(3)   |
| Co(2)-O(12)          | 2.090(3)   | Co(2)-O(12)#3        | 2.090(3)   |
| Co(2)-O(11)          | 2.101(4)   | Co(2)-O(13)          | 2.112(4)   |
| Co(2)-N(1)#3         | 2.117(3)   | Co(2)-N(1)           | 2.117(3)   |
| O(6')#1-Eu(1)-O(3)   | 83.9(5)    | O(6')#1-Eu(1)-O(5')  | 127.2(8)   |
| O(3)-Eu(1)-O(5')     | 79.5(3)    | O(6')#1-Eu(1)-O(10)  | 143.6(6)   |
| O(3)-Eu(1)-O(10)     | 69.99(18)  | O(5')-Eu(1)-O(10)    | 73.5(7)    |
| O(6')#1-Eu(1)-O(4)#1 | 70.5(6)    | O(3)-Eu(1)-O(4)#1    | 124.57(10) |
| O(5')-Eu(1)-O(4)#1   | 78.8(5)    | O(10)-Eu(1)-O(4)#1   | 145.49(17) |
| O(6')#1-Eu(1)-O(5)   | 140.0(8)   | O(3)-Eu(1)-O(5)      | 80.9(2)    |
| O(5')-Eu(1)-O(5)     | 13.19(19)  | O(10)-Eu(1)-O(5)     | 61.4(7)    |
| O(4)#1-Eu(1)-O(5)    | 88.4(6)    | O(6')#1-Eu(1)-O(6)#1 | 12.5(2)    |
| O(3)-Eu(1)-O(6)#1    | 73.3(5)    | O(5')-Eu(1)-O(6)#1   | 129.2(7)   |
| O(10)-Eu(1)-O(6)#1   | 131.3(6)   | O(4)#1-Eu(1)-O(6)#1  | 82.5(6)    |
| O(5)-Eu(1)-O(6)#1    | 140.6(6)   | O(6')#1-Eu(1)-O(9)   | 132.9(5)   |
| O(3)-Eu(1)-O(9)      | 143.25(10) | O(5')-Eu(1)-O(9)     | 76.4(5)    |
| O(10)-Eu(1)-O(9)     | 76.74(18)  | O(4)#1-Eu(1)-O(9)    | 77.13(11)  |
| O(5)-Eu(1)-O(9)      | 69.6(4)    | O(6)#1-Eu(1)-O(9)    | 143.1(5)   |
| O(6')#1-Eu(1)-O(2)#2 | 70.8(4)    | O(3)-Eu(1)-O(2)#2    | 137.69(10) |
| O(5')-Eu(1)-O(2)#2   | 142.8(3)   | O(10)-Eu(1)-O(2)#2   | 112.46(18) |
| O(4)#1-Eu(1)-O(2)#2  | 78.66(10)  | O(5)-Eu(1)-O(2)#2    | 139.3(3)   |
| O(6)#1-Eu(1)-O(2)#2  | 76.2(3)    | O(9)-Eu(1)-O(2)#2    | 69.91(11)  |
| O(6')#1-Eu(1)-O(10') | 139.6(5)   | O(3)-Eu(1)-O(10')    | 84.61(16)  |
| O(5')-Eu(1)-O(10')   | 88.2(7)    | O(10)-Eu(1)-O(10')   | 19.35(18)  |
| O(4)#1-Eu(1)-O(10')  | 144.19(17) | O(5)-Eu(1)-O(10')    | 75.2(8)    |
| O(6)#1-Eu(1)-O(10')  | 129.8(5)   | O(9)-Eu(1)-O(10')    | 67.38(16)  |
| O(2)#2-Eu(1)-O(10')  | 93.13(16)  | O(6')#1-Eu(1)-O(1)#2 | 74.1(4)    |
| O(3)-Eu(1)-O(1)#2    | 90.25(11)  | O(5')-Eu(1)-O(1)#2   | 154.4(7)   |
| O(10)-Eu(1)-O(1)#2   | 80.99(17)  | O(4)#1-Eu(1)-O(1)#2  | 125.57(10) |
| O(5)-Eu(1)-O(1)#2    | 142.2(7)   | O(6)#1-Eu(1)-O(1)#2  | 68.1(4)    |
| O(9)-Eu(1)-O(1)#2    | 99.72(11)  | O(2)#2-Eu(1)-O(1)#2  | 50.97(9)   |
| O(10')-Eu(1)-O(1)#2  | 67.40(15)  | O(6')#1-Eu(1)-O(3)#1 | 67.4(3)    |
| O(3)-Eu(1)-O(3)#1    | 75.15(10)  | O(5')-Eu(1)-O(3)#1   | 60.0(8)    |
| O(10)-Eu(1)-O(3)#1   | 125.65(17) | O(4)#1-Eu(1)-O(3)#1  | 49.85(10)  |
| O(5)-Eu(1)-O(3)#1    | 73.1(7)    | O(6)#1-Eu(1)-O(3)#1  | 71.8(3)    |
| O(9)-Eu(1)-O(3)#1    | 114.46(10) | O(2)#2-Eu(1)-O(3)#1  | 121.41(10) |
| O(10')-Eu(1)-O(3)#1  | 144.54(15) | O(1)#2-Eu(1)-O(3)#1  | 139.81(10) |
| O(12)-Co(2)-O(12)#3  | 173.17(15) | O(12)#3-Co(2)-O(11)  | 86.58(8)   |
| O(12)-Co(2)-O(11)    | 86.58(8)   | O(12)-Co(2)-O(13)    | 93.42(8)   |
| O(12)#3-Co(2)-O(13)  | 93.42(8)   | O(11)-Co(2)-O(13)    | 180.000(1) |
| O(12)-Co(2)-N(1)#3   | 88.03(11)  | O(12)#3-Co(2)-N(1)#3 | 91.91(11)  |
| O(11)-Co(2)-N(1)#3   | 89.48(8)   | O(13)-Co(2)-N(1)#3   | 90.52(8)   |

|                           |                   |                      |                   |
|---------------------------|-------------------|----------------------|-------------------|
| O(12)-Co(2)-N(1)          | 91.91(11)         | O(12)#3-Co(2)-N(1)   | 88.03(11)         |
| O(11)-Co(2)-N(1)          | 89.48(8)          | O(13)-Co(2)-N(1)     | 90.52(8)          |
| N(1)#3-Co(2)-N(1)         | 178.97(17)        |                      |                   |
| #1 $-x+3/2, -y-1/2, -z+1$ | #2 $x, -y, z-1/2$ | #3 $-x+1, y, -z+1/2$ | #4 $x, -y, z+1/2$ |

3

|                            |                            |                     |                           |
|----------------------------|----------------------------|---------------------|---------------------------|
| O(4)-Gd(1)#1               | 2.313(4)                   | O(4)-Gd(1)#2        | 2.829(4)                  |
| O(3)-Gd(1)#2               | 2.395(4)                   | Gd(1)-O(4)#3        | 2.313(4)                  |
| Gd(1)-O(5)                 | 2.359(4)                   | Gd(1)-O(8)#4        | 2.373(4)                  |
| Gd(1)-O(3)#5               | 2.395(4)                   | Gd(1)-O(13)         | 2.414(4)                  |
| Gd(1)-O(12)                | 2.473(4)                   | Gd(1)-O(2)          | 2.475(3)                  |
| Gd(1)-O(1)                 | 2.559(4)                   | Gd(1)-O(4)#5        | 2.829(4)                  |
| Co-O(9)                    | 2.082(4)                   | Co-O(9)#6           | 2.082(4)                  |
| Co-O(10)                   | 2.097(6)                   | Co-N(1)#6           | 2.112(4)                  |
| Co-N(1)                    | 2.112(4)                   | Co-O(11)            | 2.133(7)                  |
| O(4)#3-Gd(1)-O(5)          | 77.75(14)                  | O(4)#3-Gd(1)-O(8)#4 | 80.71(13)                 |
| O(5)-Gd(1)-O(8)#4          | 133.20(13)                 | O(4)#3-Gd(1)-O(3)#5 | 124.49(13)                |
| O(5)-Gd(1)-O(3)#5          | 77.27(14)                  | O(8)#4-Gd(1)-O(3)#5 | 81.74(13)                 |
| O(4)#3-Gd(1)-O(13)         | 78.45(15)                  | O(5)-Gd(1)-O(13)    | 136.76(15)                |
| O(8)#4-Gd(1)-O(13)         | 76.68(14)                  | O(3)#5-Gd(1)-O(13)  | 145.31(14)                |
| O(4)#3-Gd(1)-O(12)         | 145.46(14)                 | O(5)-Gd(1)-O(12)    | 136.69(14)                |
| O(8)#4-Gd(1)-O(12)         | 75.02(13)                  | O(3)#5-Gd(1)-O(12)  | 76.03(14)                 |
| O(13)-Gd(1)-O(12)          | 72.35(15)                  | O(4)#3-Gd(1)-O(2)   | 137.65(12)                |
| O(5)-Gd(1)-O(2)            | 73.82(13)                  | O(8)#4-Gd(1)-O(2)   | 141.22(13)                |
| O(3)#5-Gd(1)-O(2)          | 78.66(12)                  | O(13)-Gd(1)-O(2)    | 101.90(15)                |
| O(12)-Gd(1)-O(2)           | 67.94(13)                  | O(4)#3-Gd(1)-O(1)   | 90.32(13)                 |
| O(5)-Gd(1)-O(1)            | 71.39(14)                  | O(8)#4-Gd(1)-O(1)   | 149.73(14)                |
| O(3)#5-Gd(1)-O(1)          | 126.03(13)                 | O(13)-Gd(1)-O(1)    | 73.20(14)                 |
| O(12)-Gd(1)-O(1)           | 98.37(14)                  | O(2)-Gd(1)-O(1)     | 51.14(13)                 |
| O(4)#3-Gd(1)-O(4)#5        | 75.48(14)                  | O(5)-Gd(1)-O(4)#5   | 68.66(12)                 |
| O(8)#4-Gd(1)-O(4)#5        | 65.91(12)                  | O(3)#5-Gd(1)-O(4)#5 | 49.32(11)                 |
| O(13)-Gd(1)-O(4)#5         | 137.04(14)                 | O(12)-Gd(1)-O(4)#5  | 114.87(12)                |
| O(2)-Gd(1)-O(4)#5          | 120.36(12)                 | O(1)-Gd(1)-O(4)#5   | 139.55(13)                |
| O(9)-Co-O(9)#6             | 172.9(2)                   | O(9)-Co-O(10)       | 86.45(12)                 |
| O(9)#6-Co-O(10)            | 86.45(12)                  | O(9)-Co-N(1)#6      | 87.55(17)                 |
| O(9)#6-Co-N(1)#6           | 92.46(17)                  | O(10)-Co-N(1)#6     | 90.11(14)                 |
| O(9)-Co-N(1)               | 92.46(17)                  | O(9)#6-Co-N(1)      | 87.55(17)                 |
| O(10)-Co-N(1)              | 90.11(14)                  | N(1)#6-Co-N(1)      | 179.8(3)                  |
| O(9)-Co-O(11)              | 93.55(12)                  | O(9)#6-Co-O(11)     | 93.55(12)                 |
| O(10)-Co-O(11)             | 180.000(1)                 | N(1)#6-Co-O(11)     | 89.89(14)                 |
| N(1)-Co-O(11)              | 89.89(14)                  |                     |                           |
| #1 $x, -y, z-1/2$          | #2 $-x+3/2, y-1/2, -z+3/2$ | #3 $x, -y, z+1/2$   | #4 $-x+3/2, -y+1/2, -z+2$ |
| #5 $-x+3/2, y+1/2, -z+3/2$ | #6 $-x+1, y, -z+1/2$       |                     |                           |

4

|            |          |              |          |
|------------|----------|--------------|----------|
| Tb(1)-O(4) | 2.291(2) | Tb(1)-O(6)#1 | 2.349(2) |
|------------|----------|--------------|----------|

|                       |                |                        |                        |
|-----------------------|----------------|------------------------|------------------------|
| Tb(1)-O(5)            | 2.349(2)       | Tb(1)-O(9)             | 2.355(2)               |
| Tb(1)-O(3)            | 2.363(2)       | Tb(1)-O(1)             | 2.432(2)               |
| Tb(1)-O(10)           | 2.478(2)       | Tb(1)-O(2)             | 2.620(2)               |
| Tb(1)-O(4)#1          | 2.887(2)       | Co-O(13)               | 2.091(3)               |
| Co-N(1)#2             | 2.109(3)       | Co-N(1)                | 2.109(3)               |
| Co-O(12)#2            | 2.113(2)       | Co-O(12)               | 2.113(2)               |
| Co-O(11)              | 2.122(4)       |                        |                        |
| O(4)-Tb(1)-O(6)#1     | 81.26(8)       | O(4)-Tb(1)-O(5)        | 80.37(8)               |
| O(6)#1-Tb(1)-O(5)     | 130.54(8)      | O(4)-Tb(1)-O(9)        | 80.63(8)               |
| O(6)#1-Tb(1)-O(9)     | 79.95(8)       | O(5)-Tb(1)-O(9)        | 140.27(9)              |
| O(4)-Tb(1)-O(3)       | 125.02(8)      | O(6)#1-Tb(1)-O(3)      | 79.11(8)               |
| O(5)-Tb(1)-O(3)       | 74.93(9)       | O(9)-Tb(1)-O(3)        | 143.28(9)              |
| O(4)-Tb(1)-O(1)       | 135.88(8)      | O(6)#1-Tb(1)-O(1)      | 142.36(8)              |
| O(5)-Tb(1)-O(1)       | 73.10(8)       | O(9)-Tb(1)-O(1)        | 97.91(8)               |
| O(3)-Tb(1)-O(1)       | 81.22(8)       | O(4)-Tb(1)-O(10)       | 146.79(8)              |
| O(6)#1-Tb(1)-O(10)    | 74.26(8)       | O(5)-Tb(1)-O(10)       | 132.76(8)              |
| O(9)-Tb(1)-O(10)      | 73.37(8)       | O(3)-Tb(1)-O(10)       | 72.09(8)               |
| O(1)-Tb(1)-O(10)      | 69.26(7)       | O(4)-Tb(1)-O(2)        | 87.07(8)               |
| O(6)#1-Tb(1)-O(2)     | 152.69(8)      | O(5)-Tb(1)-O(2)        | 70.67(8)               |
| O(9)-Tb(1)-O(2)       | 73.82(8)       | O(3)-Tb(1)-O(2)        | 127.21(8)              |
| O(1)-Tb(1)-O(2)       | 51.25(7)       | O(10)-Tb(1)-O(2)       | 104.68(8)              |
| O(4)-Tb(1)-O(4)#1     | 76.48(8)       | O(6)#1-Tb(1)-O(4)#1    | 64.38(7)               |
| O(5)-Tb(1)-O(4)#1     | 66.80(8)       | O(9)-Tb(1)-O(4)#1      | 139.85(8)              |
| O(3)-Tb(1)-O(4)#1     | 48.72(7)       | O(1)-Tb(1)-O(4)#1      | 121.43(7)              |
| O(10)-Tb(1)-O(4)#1    | 111.21(7)      | O(2)-Tb(1)-O(4)#1      | 136.27(7)              |
| O(13)-Co-N(1)#2       | 89.85(8)       | O(13)-Co-N(1)          | 89.85(8)               |
| N(1)#2-Co-N(1)        | 179.70(17)     | O(13)-Co-O(12)#2       | 86.93(7)               |
| N(1)#2-Co-O(12)#2     | 93.20(10)      | N(1)-Co-O(12)#2        | 86.78(10)              |
| O(13)-Co-O(12)        | 86.93(7)       | N(1)#2-Co-O(12)        | 86.78(10)              |
| N(1)-Co-O(12)         | 93.20(10)      | O(12)#2-Co-O(12)       | 173.86(13)             |
| O(13)-Co-O(11)        | 180.0          | N(1)#2-Co-O(11)        | 90.15(8)               |
| N(1)-Co-O(11)         | 90.15(8)       | O(12)#2-Co-O(11)       | 93.07(7)               |
| O(12)-Co-O(11)        | 93.07(7)       |                        |                        |
| #1 -x+1/2,-y+1/2,-z+1 | #2 -x,y,-z-1/2 | #3 -x+1/2,y-1/2,-z+1/2 | #4 -x+1/2,y+1/2,-z+1/2 |

5

|                   |          |                     |          |
|-------------------|----------|---------------------|----------|
| Co(1)-O(13)       | 2.093(5) | Co(1)-O(12)         | 2.100(3) |
| Co(1)-O(12)#1     | 2.100(3) | Co(1)-N(1)          | 2.108(4) |
| Co(1)-N(1)#1      | 2.108(4) | Co(1)-O(11)         | 2.147(5) |
| Dy(1)-O(2)        | 2.286(3) | Dy(1)-O(7)#2        | 2.328(3) |
| Dy(1)-O(5)        | 2.332(3) | Dy(1)-O(1)#2        | 2.353(3) |
| Dy(1)-O(10)       | 2.400(3) | Dy(1)-O(9)          | 2.442(3) |
| Dy(1)-O(3)        | 2.451(3) | Dy(1)-O(4)          | 2.525(3) |
| Dy(1)-O(2)#2      | 2.838(3) |                     |          |
| O(13)-Co(1)-O(12) | 87.05(9) | O(13)-Co(1)-O(12)#1 | 87.05(9) |

|                      |                       |                     |                 |
|----------------------|-----------------------|---------------------|-----------------|
| O(12)-Co(1)-O(12)#1  | 174.10(18)            | O(13)-Co(1)-N(1)    | 90.31(11)       |
| O(12)-Co(1)-N(1)     | 87.90(14)             | O(12)#1-Co(1)-N(1)  | 92.13(14)       |
| O(13)-Co(1)-N(1)#1   | 90.31(11)             | O(12)-Co(1)-N(1)#1  | 92.13(14)       |
| O(12)#1-Co(1)-N(1)#1 | 87.90(14)             | N(1)-Co(1)-N(1)#1   | 179.4(2)        |
| O(13)-Co(1)-O(11)    | 180.000(1)            | O(12)-Co(1)-O(11)   | 92.95(9)        |
| O(12)#1-Co(1)-O(11)  | 92.95(9)              | N(1)-Co(1)-O(11)    | 89.69(11)       |
| N(1)#1-Co(1)-O(11)   | 89.69(11)             | O(2)-Dy(1)-O(7)#2   | 77.89(12)       |
| O(2)-Dy(1)-O(5)      | 80.78(11)             | O(7)#2-Dy(1)-O(5)   | 133.27(12)      |
| O(2)-Dy(1)-O(1)#2    | 123.99(11)            | O(7)#2-Dy(1)-O(1)#2 | 77.21(13)       |
| O(5)-Dy(1)-O(1)#2    | 81.28(12)             | O(2)-Dy(1)-O(10)    | 77.37(14)       |
| O(7)#2-Dy(1)-O(10)   | 136.91(13)            | O(5)-Dy(1)-O(10)    | 75.80(14)       |
| O(1)#2-Dy(1)-O(10)   | 145.56(13)            | O(2)-Dy(1)-O(9)     | 145.07(11)      |
| O(7)#2-Dy(1)-O(9)    | 136.94(12)            | O(5)-Dy(1)-O(9)     | 74.68(11)       |
| O(1)#2-Dy(1)-O(9)    | 76.56(11)             | O(10)-Dy(1)-O(9)    | 72.82(13)       |
| O(2)-Dy(1)-O(3)      | 137.81(11)            | O(7)#2-Dy(1)-O(3)   | 73.33(12)       |
| O(5)-Dy(1)-O(3)      | 141.10(11)            | O(1)#2-Dy(1)-O(3)   | 78.64(11)       |
| O(10)-Dy(1)-O(3)     | 103.86(14)            | O(9)-Dy(1)-O(3)     | 68.44(11)       |
| O(2)-Dy(1)-O(4)      | 90.17(11)             | O(7)#2-Dy(1)-O(4)   | 71.36(12)       |
| O(5)-Dy(1)-O(4)      | 149.70(12)            | O(1)#2-Dy(1)-O(4)   | 126.64(11)      |
| O(10)-Dy(1)-O(4)     | 74.01(13)             | O(9)-Dy(1)-O(4)     | 98.60(12)       |
| O(3)-Dy(1)-O(4)      | 51.74(11)             | O(2)-Dy(1)-O(2)#2   | 75.32(11)       |
| O(7)#2-Dy(1)-O(2)#2  | 68.81(11)             | O(5)-Dy(1)-O(2)#2   | 65.75(10)       |
| O(1)#2-Dy(1)-O(2)#2  | 48.96(10)             | O(10)-Dy(1)-O(2)#2  | 135.55(13)      |
| O(9)-Dy(1)-O(2)#2    | 114.96(11)            | O(3)-Dy(1)-O(2)#2   | 119.93(10)      |
| O(4)-Dy(1)-O(2)#2    | 139.60(11)            |                     |                 |
| #1 -x+1,y,-z+1/2     | #2 -x+3/2,-y+3/2,-z+2 | #3 x,-y+1,z-1/2     | #4 x,-y+1,z+1/2 |

6

|                     |            |                      |            |
|---------------------|------------|----------------------|------------|
| O(2)-Ho(1)#1        | 2.344(2)   | O(1)-Ho(1)#2         | 2.270(2)   |
| O(1)-Ho(1)#1        | 2.855(2)   | Co(2)-O(13)          | 2.084(4)   |
| Co(2)-O(11)         | 2.099(2)   | Co(2)-O(11)#3        | 2.099(2)   |
| Co(2)-N(1)#3        | 2.103(3)   | Co(2)-N(1)           | 2.103(3)   |
| Co(2)-O(12)         | 2.148(4)   | Ho(1)-O(1)#4         | 2.270(2)   |
| Ho(1)-O(5)          | 2.316(2)   | Ho(1)-O(6)#5         | 2.326(2)   |
| Ho(1)-O(2)#6        | 2.344(2)   | Ho(1)-O(10)          | 2.386(3)   |
| Ho(1)-O(9)          | 2.426(3)   | Ho(1)-O(3)           | 2.443(2)   |
| Ho(1)-O(4)          | 2.517(3)   | Ho(1)-O(1)#6         | 2.855(2)   |
| O(13)-Co(2)-O(11)   | 86.79(7)   | O(13)-Co(2)-O(11)#3  | 86.79(7)   |
| O(11)-Co(2)-O(11)#3 | 173.59(15) | O(13)-Co(2)-N(1)#3   | 90.34(9)   |
| O(11)-Co(2)-N(1)#3  | 87.65(10)  | O(11)#3-Co(2)-N(1)#3 | 92.39(10)  |
| O(13)-Co(2)-N(1)    | 90.34(9)   | O(11)-Co(2)-N(1)     | 92.39(10)  |
| O(11)#3-Co(2)-N(1)  | 87.65(10)  | N(1)#3-Co(2)-N(1)    | 179.32(18) |
| O(13)-Co(2)-O(12)   | 180.000(1) | O(11)-Co(2)-O(12)    | 93.21(7)   |
| O(11)#3-Co(2)-O(12) | 93.21(7)   | N(1)#3-Co(2)-O(12)   | 89.66(9)   |
| N(1)-Co(2)-O(12)    | 89.66(9)   | O(1)#4-Ho(1)-O(5)    | 78.01(9)   |



|                        |                        |                     |                 |
|------------------------|------------------------|---------------------|-----------------|
| O(1)#4-Ho(1)-O(6)#5    | 80.68(8)               | O(5)-Ho(1)-O(6)#5   | 133.04(9)       |
| O(1)#4-Ho(1)-O(2)#6    | 124.01(9)              | O(5)-Ho(1)-O(2)#6   | 77.35(10)       |
| O(6)#5-Ho(1)-O(2)#6    | 80.92(9)               | O(1)#4-Ho(1)-O(10)  | 77.41(11)       |
| O(5)-Ho(1)-O(10)       | 136.47(11)             | O(6)#5-Ho(1)-O(10)  | 76.68(11)       |
| O(2)#6-Ho(1)-O(10)     | 145.79(10)             | O(1)#4-Ho(1)-O(9)   | 144.99(9)       |
| O(5)-Ho(1)-O(9)        | 136.90(10)             | O(6)#5-Ho(1)-O(9)   | 74.87(9)        |
| O(2)#6-Ho(1)-O(9)      | 76.53(10)              | O(10)-Ho(1)-O(9)    | 72.87(11)       |
| O(1)#4-Ho(1)-O(3)      | 137.75(8)              | O(5)-Ho(1)-O(3)     | 73.18(9)        |
| O(6)#5-Ho(1)-O(3)      | 141.28(8)              | O(2)#6-Ho(1)-O(3)   | 78.80(9)        |
| O(10)-Ho(1)-O(3)       | 103.39(12)             | O(9)-Ho(1)-O(3)     | 68.53(9)        |
| O(1)#4-Ho(1)-O(4)      | 89.97(9)               | O(5)-Ho(1)-O(4)     | 71.65(10)       |
| O(6)#5-Ho(1)-O(4)      | 149.53(10)             | O(2)#6-Ho(1)-O(4)   | 127.21(8)       |
| O(10)-Ho(1)-O(4)       | 72.98(11)              | O(9)-Ho(1)-O(4)     | 98.53(10)       |
| O(3)-Ho(1)-O(4)        | 52.00(8)               | O(1)#4-Ho(1)-O(1)#6 | 75.30(8)        |
| O(5)-Ho(1)-O(1)#6      | 68.73(8)               | O(6)#5-Ho(1)-O(1)#6 | 65.57(8)        |
| O(2)#6-Ho(1)-O(1)#6    | 48.96(8)               | O(10)-Ho(1)-O(1)#6  | 136.16(11)      |
| O(9)-Ho(1)-O(1)#6      | 115.11(9)              | O(3)-Ho(1)-O(1)#6   | 119.88(8)       |
| O(4)-Ho(1)-O(1)#6      | 139.74(9)              |                     |                 |
| #1 -x+3/2,y-1/2,-z+3/2 | #2 x,-y+1,z-1/2        | #3 -x+1,y,-z+1/2    | #4 x,-y+1,z+1/2 |
| #5 -x+3/2,-y+3/2,-z+2  | #6 -x+3/2,y+1/2,-z+3/2 |                     |                 |

7

|                   |            |                   |            |
|-------------------|------------|-------------------|------------|
| Er(1)-O(9)        | 2.295(3)   | Er(1)-O(1)        | 2.301(3)   |
| Er(1)-O(7)        | 2.311(3)   | Er(1)-O(13)       | 2.335(3)   |
| Er(1)-O(17)       | 2.352(3)   | Er(1)-O(18)       | 2.376(3)   |
| Er(1)-O(6)        | 2.378(3)   | Er(1)-O(5)        | 2.458(3)   |
| Er(2)-O(8)        | 2.226(3)   | Er(2)-O(10)       | 2.302(3)   |
| Er(2)-O(19)       | 2.341(3)   | Er(2)-O(14)       | 2.350(3)   |
| Er(2)-O(2)        | 2.351(3)   | Er(2)-O(3)#1      | 2.364(3)   |
| Er(2)-O(20)       | 2.433(3)   | Er(2)-O(1)        | 2.672(3)   |
| Er(2)-O(4)#1      | 2.786(3)   | Co(1)-O(24)       | 2.053(3)   |
| Co(1)-O(23)       | 2.103(3)   | Co(1)-N(2)        | 2.109(4)   |
| Co(1)-N(4)#2      | 2.112(4)   | Co(1)-O(21)       | 2.140(3)   |
| Co(1)-O(22)       | 2.141(3)   | O(3)-Er(2)#3      | 2.364(3)   |
| O(4)-Er(2)#3      | 2.786(3)   |                   |            |
| O(9)-Er(1)-O(1)   | 72.08(11)  | O(9)-Er(1)-O(7)   | 79.93(11)  |
| O(1)-Er(1)-O(7)   | 116.26(10) | O(9)-Er(1)-O(13)  | 130.89(10) |
| O(1)-Er(1)-O(13)  | 80.12(11)  | O(7)-Er(1)-O(13)  | 77.23(11)  |
| O(9)-Er(1)-O(17)  | 141.26(11) | O(1)-Er(1)-O(17)  | 146.21(10) |
| O(7)-Er(1)-O(17)  | 82.86(11)  | O(13)-Er(1)-O(17) | 77.40(11)  |
| O(9)-Er(1)-O(18)  | 133.22(12) | O(1)-Er(1)-O(18)  | 75.71(10)  |
| O(7)-Er(1)-O(18)  | 145.87(12) | O(13)-Er(1)-O(18) | 73.57(11)  |
| O(17)-Er(1)-O(18) | 73.93(11)  | O(9)-Er(1)-O(6)   | 75.04(11)  |
| O(1)-Er(1)-O(6)   | 97.90(11)  | O(7)-Er(1)-O(6)   | 128.33(10) |
| O(13)-Er(1)-O(6)  | 149.90(10) | O(17)-Er(1)-O(6)  | 89.34(11)  |

|                      |                   |                      |                      |
|----------------------|-------------------|----------------------|----------------------|
| O(18)-Er(1)-O(6)     | 76.84(11)         | O(9)-Er(1)-O(5)      | 72.52(10)            |
| O(1)-Er(1)-O(5)      | 139.32(11)        | O(7)-Er(1)-O(5)      | 76.03(11)            |
| O(13)-Er(1)-O(5)     | 139.62(10)        | O(17)-Er(1)-O(5)     | 69.73(11)            |
| O(18)-Er(1)-O(5)     | 116.99(10)        | O(6)-Er(1)-O(5)      | 53.62(10)            |
| O(8)-Er(2)-O(10)     | 79.71(11)         | O(8)-Er(2)-O(19)     | 79.95(11)            |
| O(10)-Er(2)-O(19)    | 80.40(11)         | O(8)-Er(2)-O(14)     | 83.44(11)            |
| O(10)-Er(2)-O(14)    | 135.89(10)        | O(19)-Er(2)-O(14)    | 135.90(11)           |
| O(8)-Er(2)-O(2)      | 131.32(11)        | O(10)-Er(2)-O(2)     | 85.22(11)            |
| O(19)-Er(2)-O(2)     | 142.33(11)        | O(14)-Er(2)-O(2)     | 76.03(11)            |
| O(8)-Er(2)-O(3)#1    | 130.57(11)        | O(10)-Er(2)-O(3)#1   | 144.49(10)           |
| O(19)-Er(2)-O(3)#1   | 86.91(11)         | O(14)-Er(2)-O(3)#1   | 73.68(10)            |
| O(2)-Er(2)-O(3)#1    | 84.97(10)         | O(8)-Er(2)-O(20)     | 144.00(11)           |
| O(10)-Er(2)-O(20)    | 74.08(11)         | O(19)-Er(2)-O(20)    | 71.78(10)            |
| O(14)-Er(2)-O(20)    | 132.51(10)        | O(2)-Er(2)-O(20)     | 70.83(10)            |
| O(3)#1-Er(2)-O(20)   | 70.46(11)         | O(8)-Er(2)-O(1)      | 80.05(10)            |
| O(10)-Er(2)-O(1)     | 69.33(9)          | O(19)-Er(2)-O(1)     | 146.14(10)           |
| O(14)-Er(2)-O(1)     | 67.74(10)         | O(2)-Er(2)-O(1)      | 51.37(10)            |
| O(3)#1-Er(2)-O(1)    | 126.67(9)         | O(20)-Er(2)-O(1)     | 112.14(10)           |
| O(8)-Er(2)-O(4)#1    | 81.11(10)         | O(10)-Er(2)-O(4)#1   | 146.57(9)            |
| O(19)-Er(2)-O(4)#1   | 69.45(10)         | O(14)-Er(2)-O(4)#1   | 67.77(10)            |
| O(2)-Er(2)-O(4)#1    | 127.67(10)        | O(3)#1-Er(2)-O(4)#1  | 49.82(10)            |
| O(20)-Er(2)-O(4)#1   | 108.25(10)        | O(1)-Er(2)-O(4)#1    | 133.16(9)            |
| O(24)-Co(1)-O(23)    | 85.70(13)         | O(24)-Co(1)-N(2)     | 92.65(14)            |
| O(23)-Co(1)-N(2)     | 93.13(13)         | O(24)-Co(1)-N(4)#2   | 87.15(14)            |
| O(23)-Co(1)-N(4)#2   | 87.42(13)         | N(2)-Co(1)-N(4)#2    | 179.39(16)           |
| O(24)-Co(1)-O(21)    | 172.47(12)        | O(23)-Co(1)-O(21)    | 86.79(12)            |
| N(2)-Co(1)-O(21)     | 87.17(14)         | N(4)#2-Co(1)-O(21)   | 93.11(14)            |
| O(24)-Co(1)-O(22)    | 97.58(12)         | O(23)-Co(1)-O(22)    | 175.08(13)           |
| N(2)-Co(1)-O(22)     | 90.39(13)         | N(4)#2-Co(1)-O(22)   | 89.07(13)            |
| O(21)-Co(1)-O(22)    | 89.95(12)         |                      |                      |
| #1 -x+2,y-1/2,-z+1/2 | #2 -x+1,-y+1,-z+1 | #3 -x+2,y+1/2,-z+1/2 | #4 -x+1,y+1/2,-z+1/2 |
| #5 -x+1,y-1/2,-z+1/2 |                   |                      |                      |
